# Supplementary material for: Product selectivity control induced by using liquid–liquid parallel laminar flow in a microreactor
Source: Royal Society of Chemistry journal article supplement (doi:10.1039/c1ob05174a), 2011-01-01

Electronic Supplementary Information for

## **Product selectivity control induced by using liquid-liquid parallel laminar flow in a microreactor**

Fumihiro Amemiya, Hideyuki Matsumoto, Keishi Fuse, Tsuneo Kashiwagi, Chiaki Kuroda,  
Toshio Fuchigami and Mahito Atobe \*

*Department of Environment and System Sciences, Yokohama National University  
79-7 Tokiwadai, Hodogaya-ku, Yokohama, 2408501 Japan*

\*To whom the correspondence should be addressed.

E-mail: atobe@ynu.ac.jp

**This PDF file includes  $^1\text{H}$  NMR spectra.**

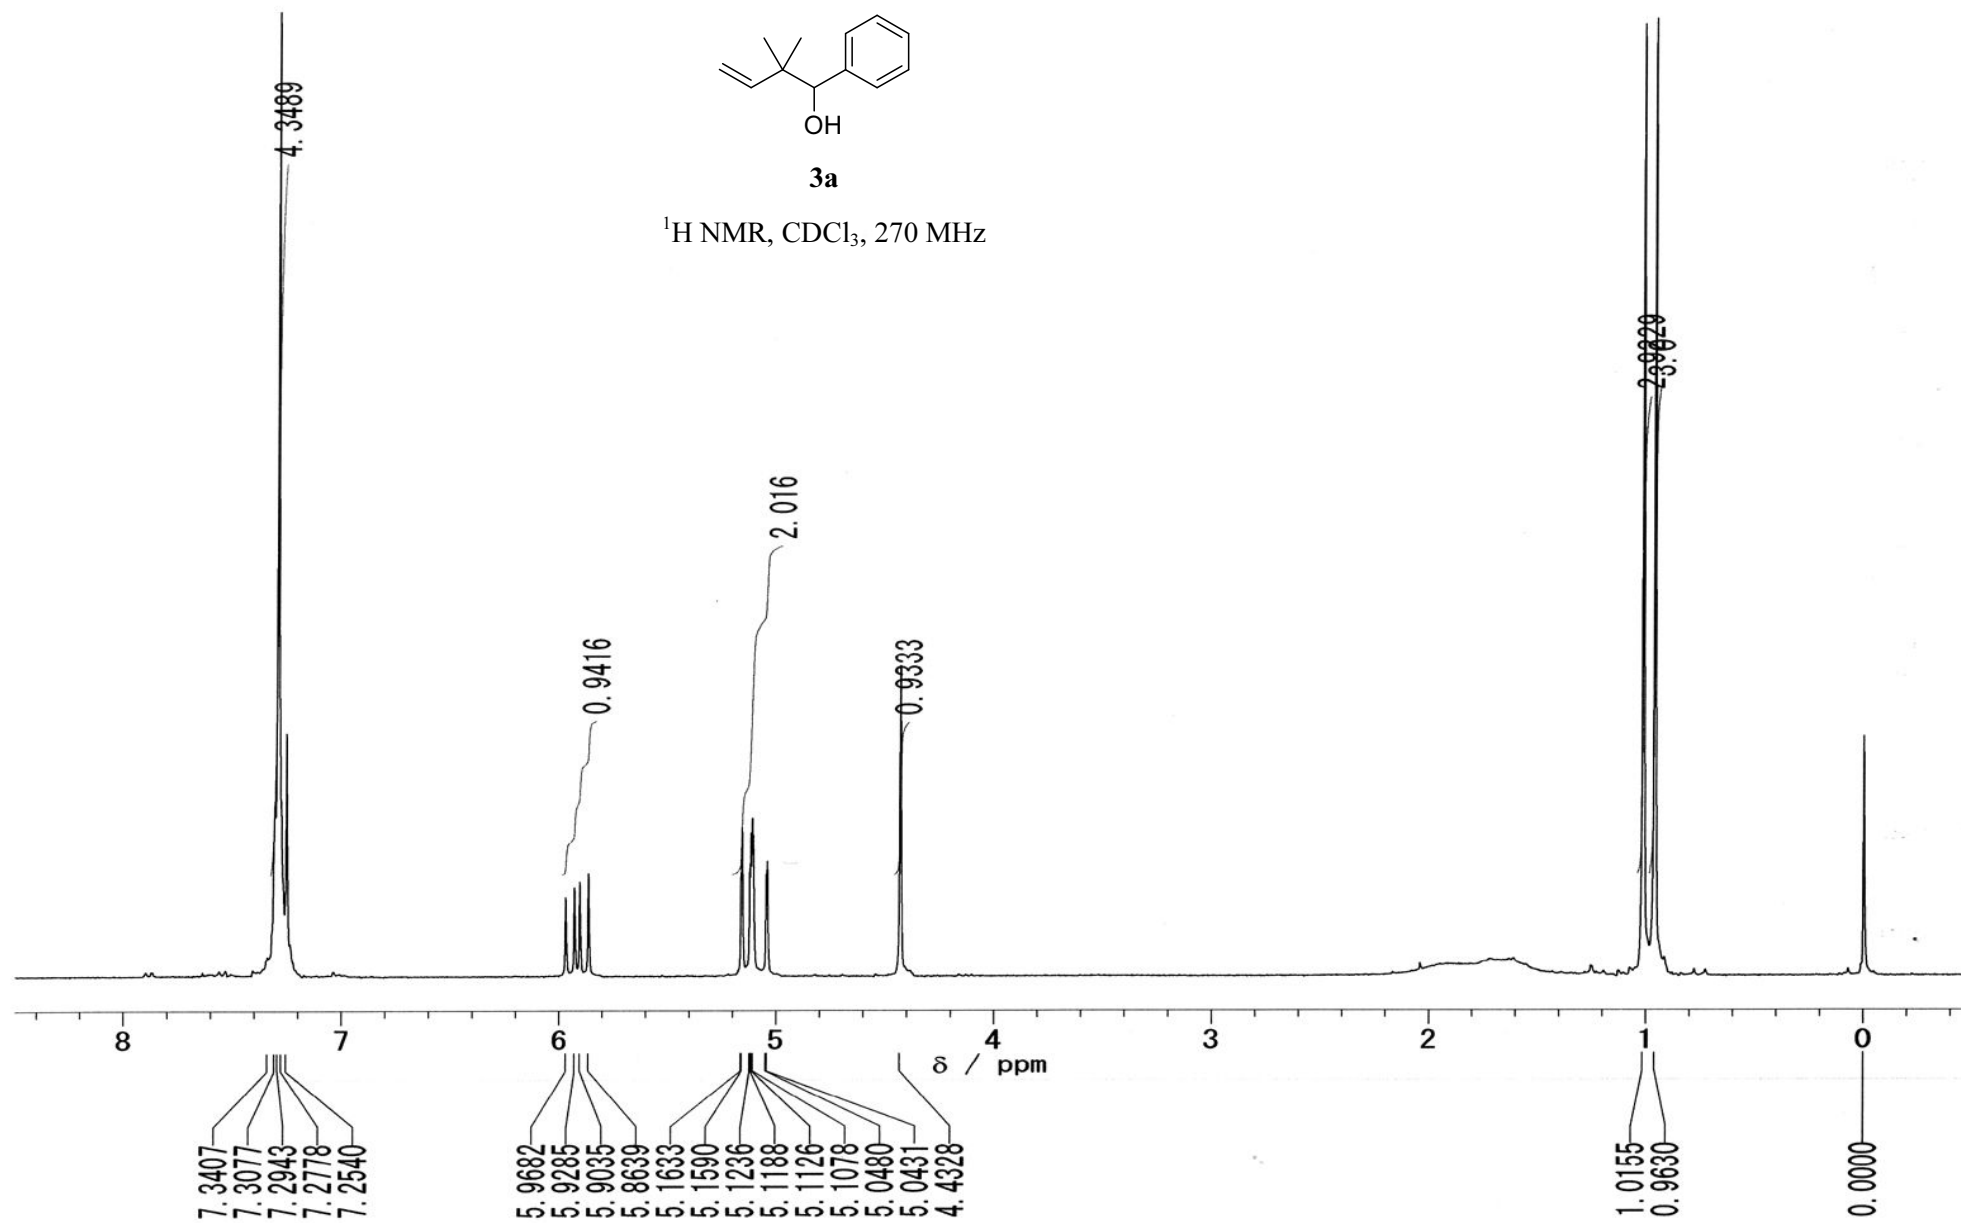

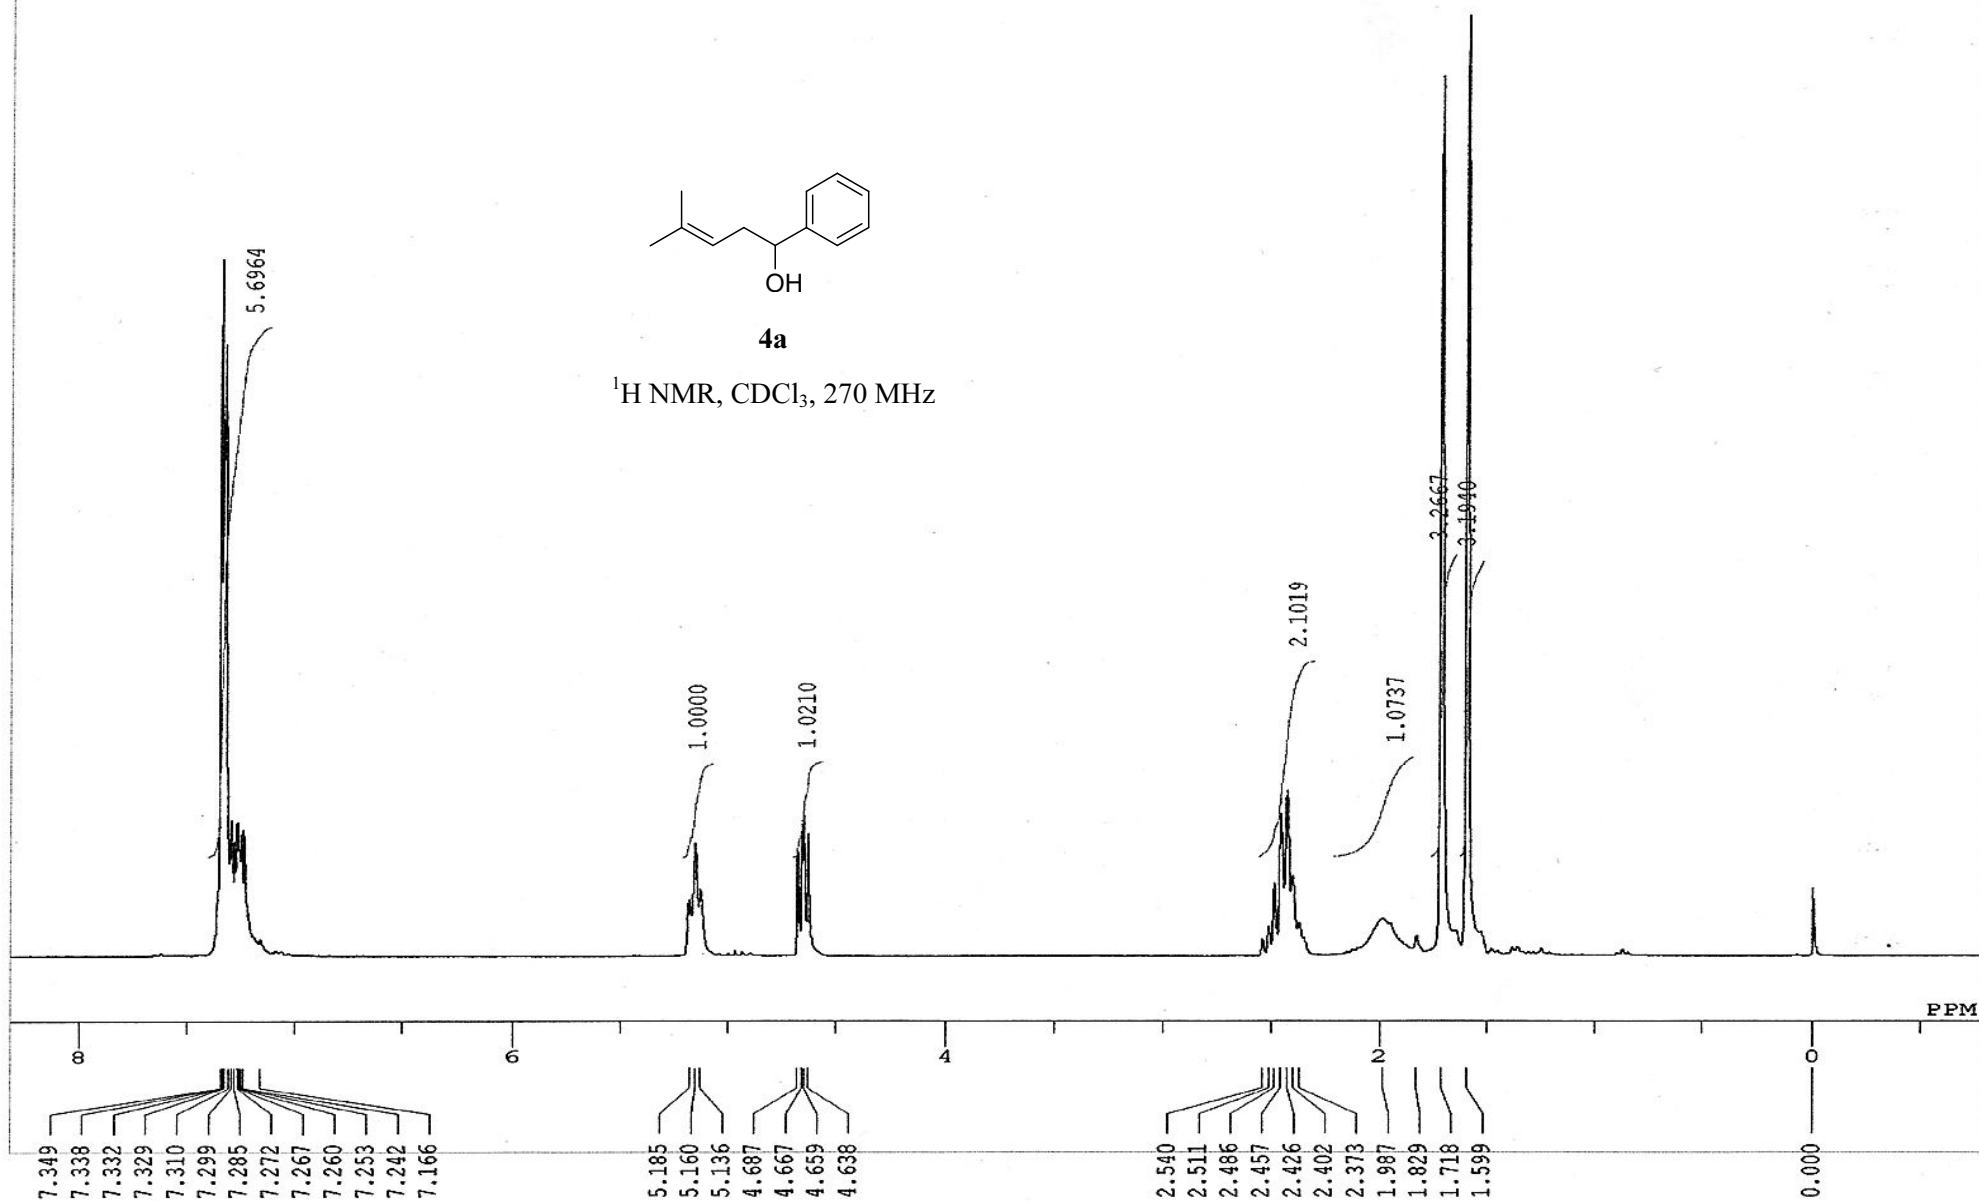

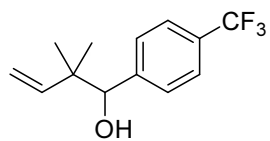

**3b**

$^1\text{H}$  NMR,  $\text{CDCl}_3$ , 270 MHz

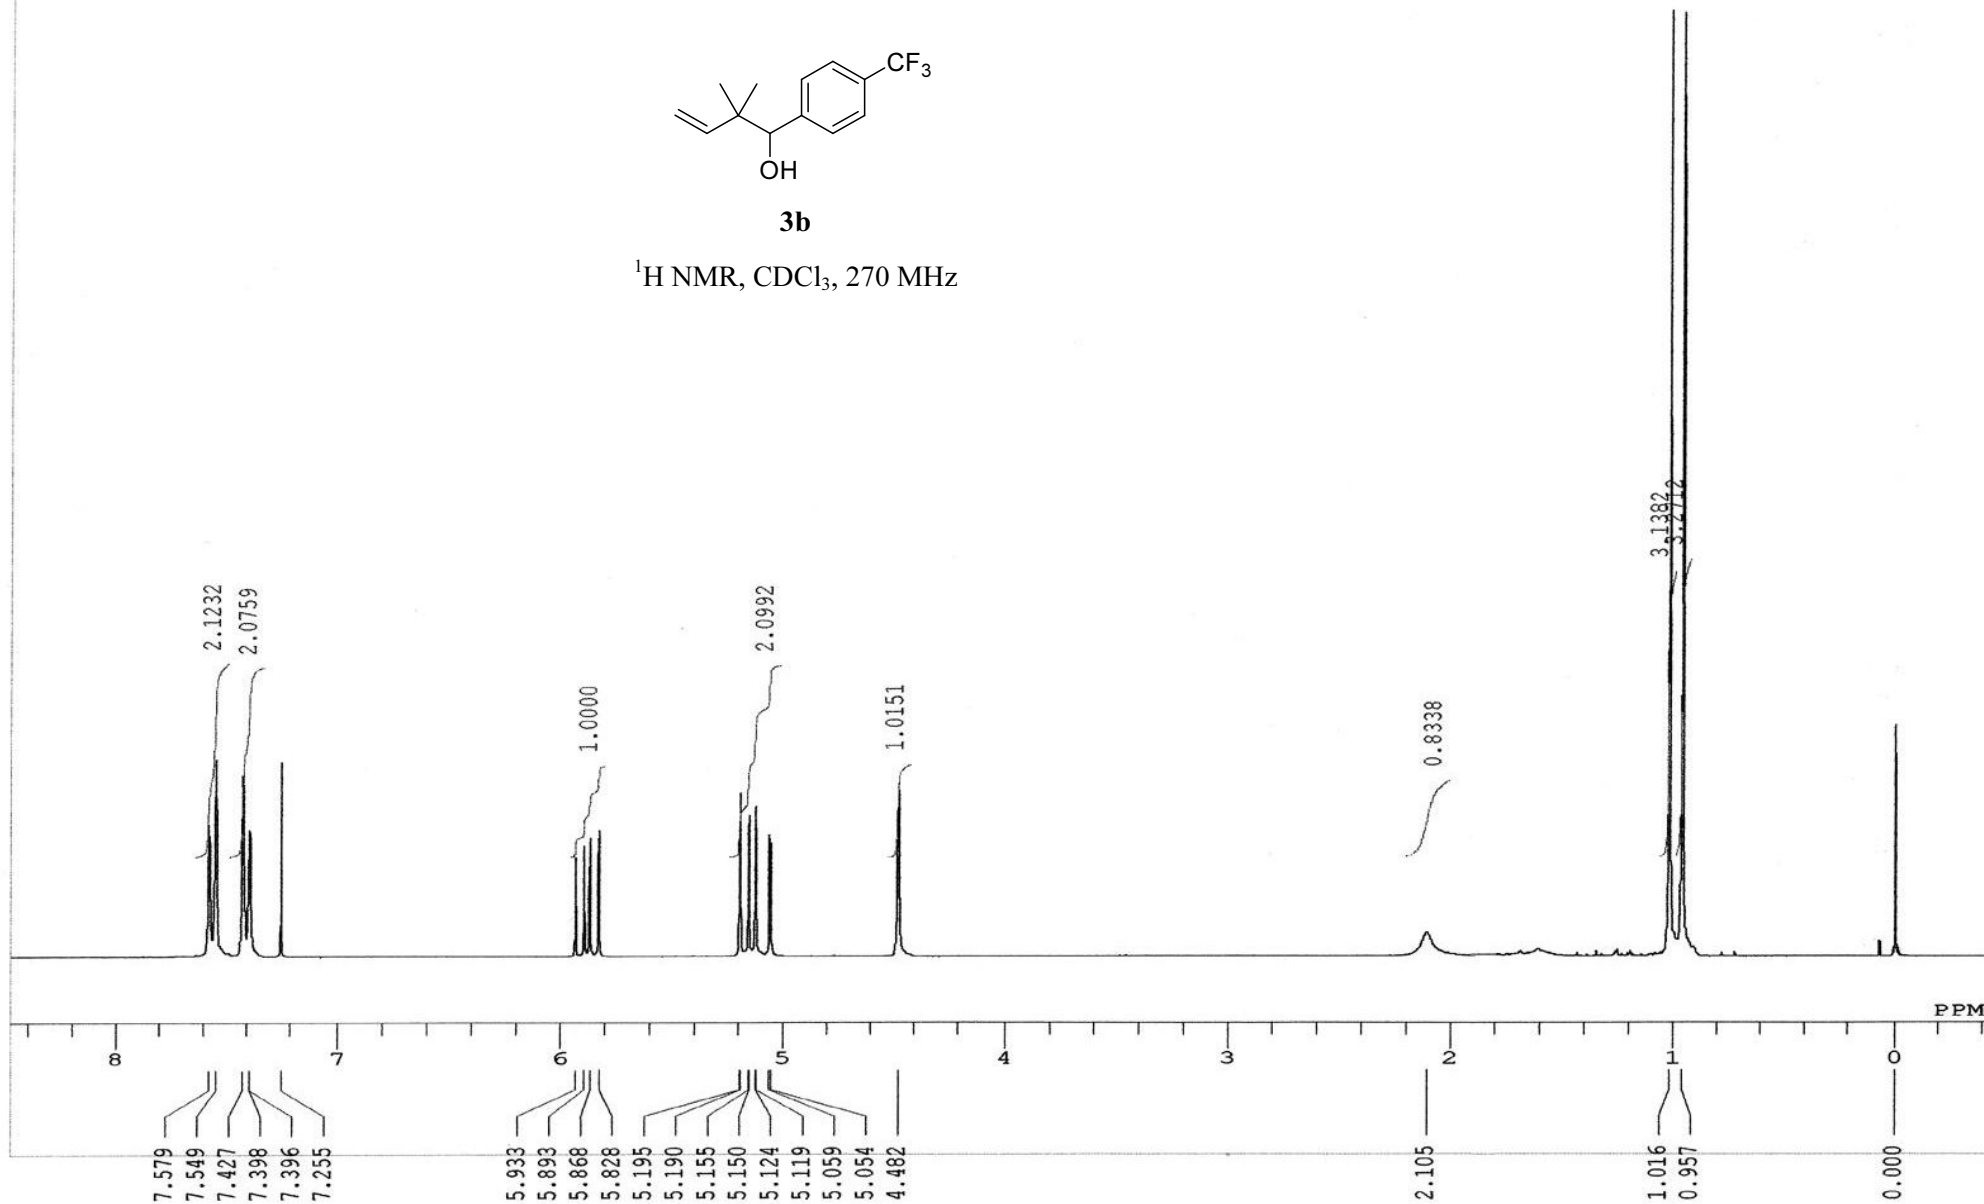

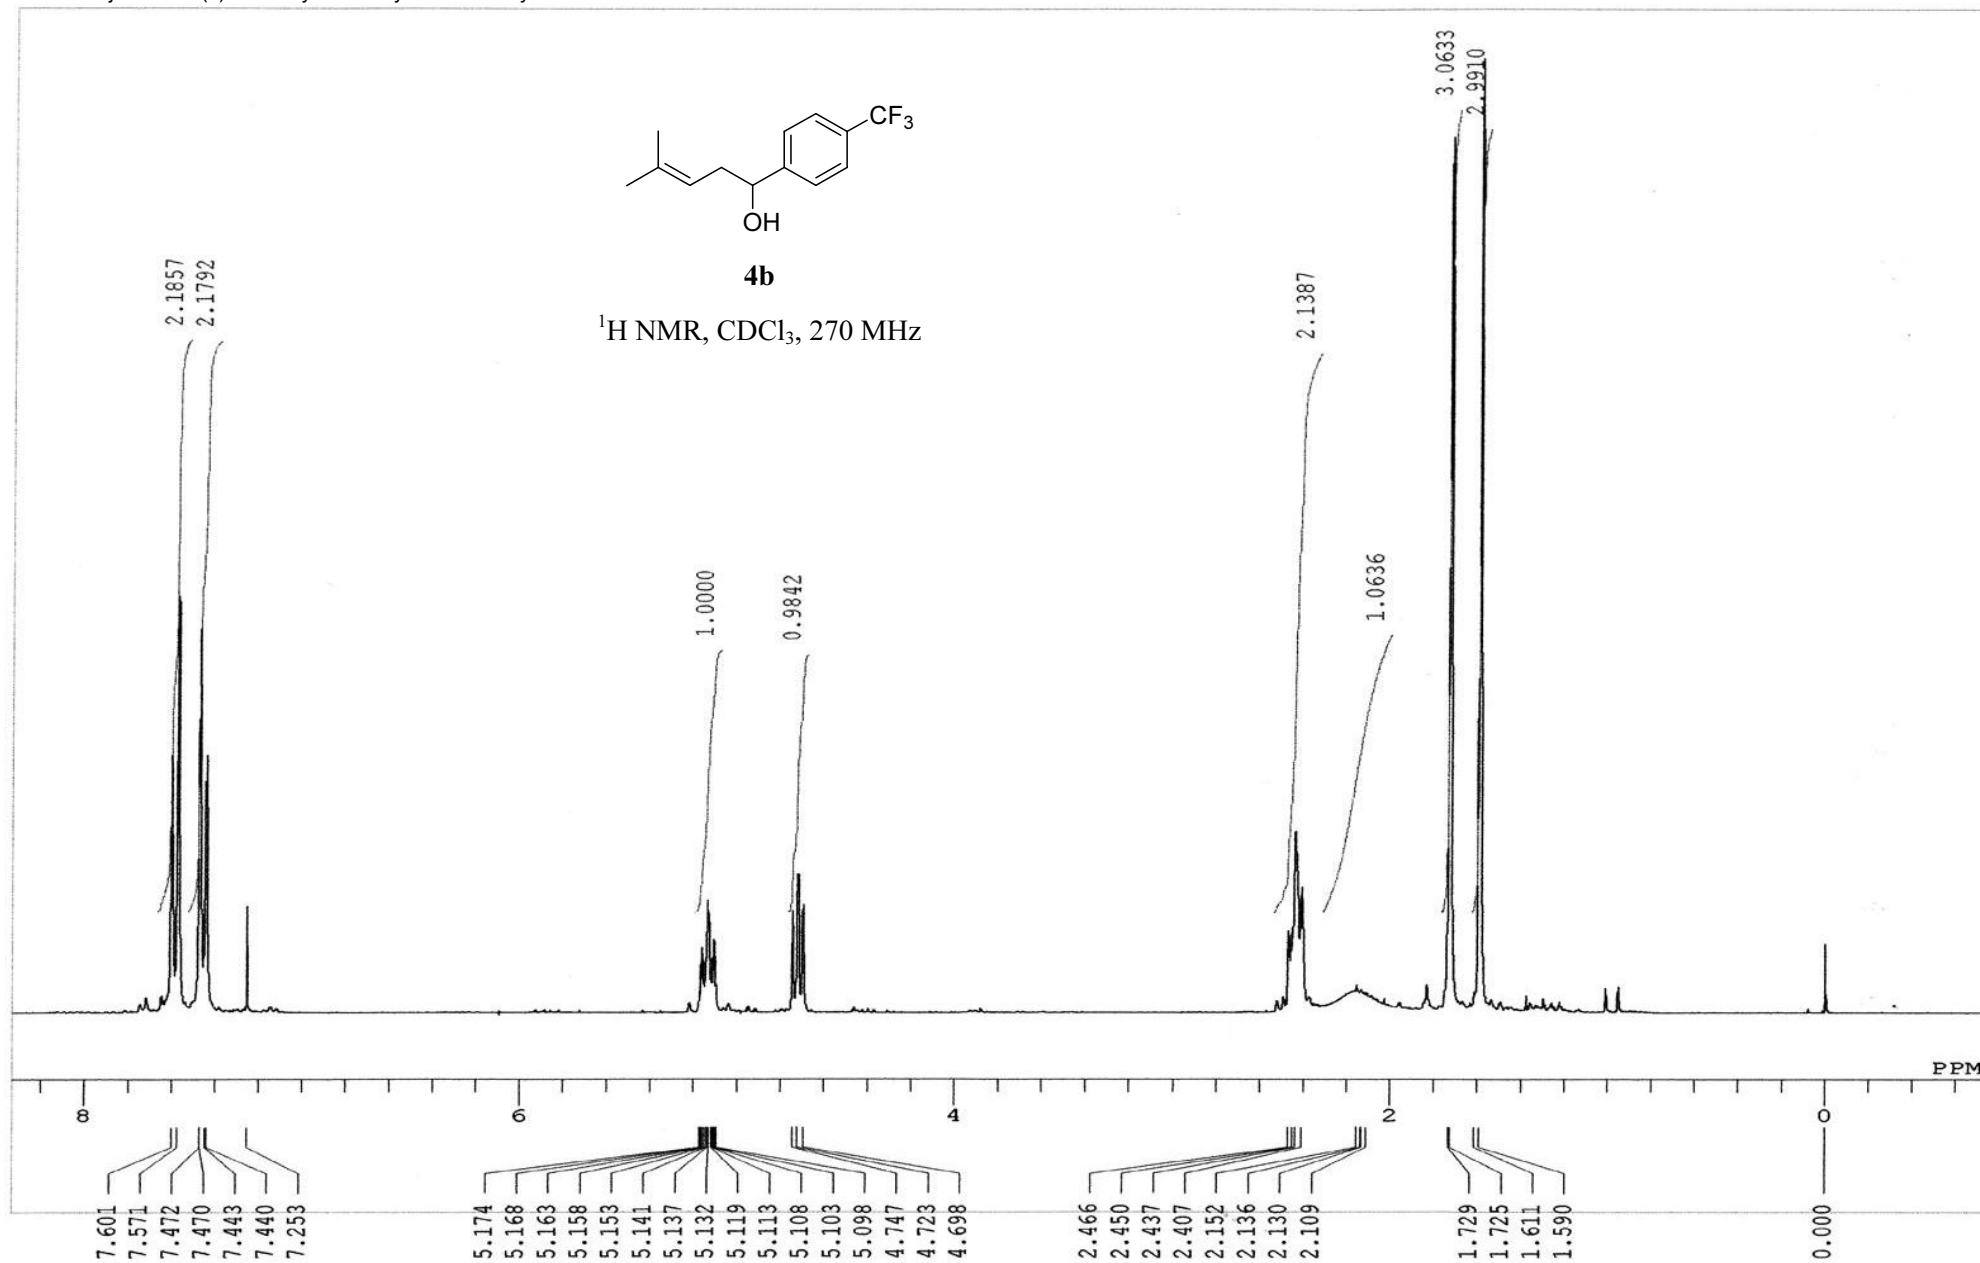

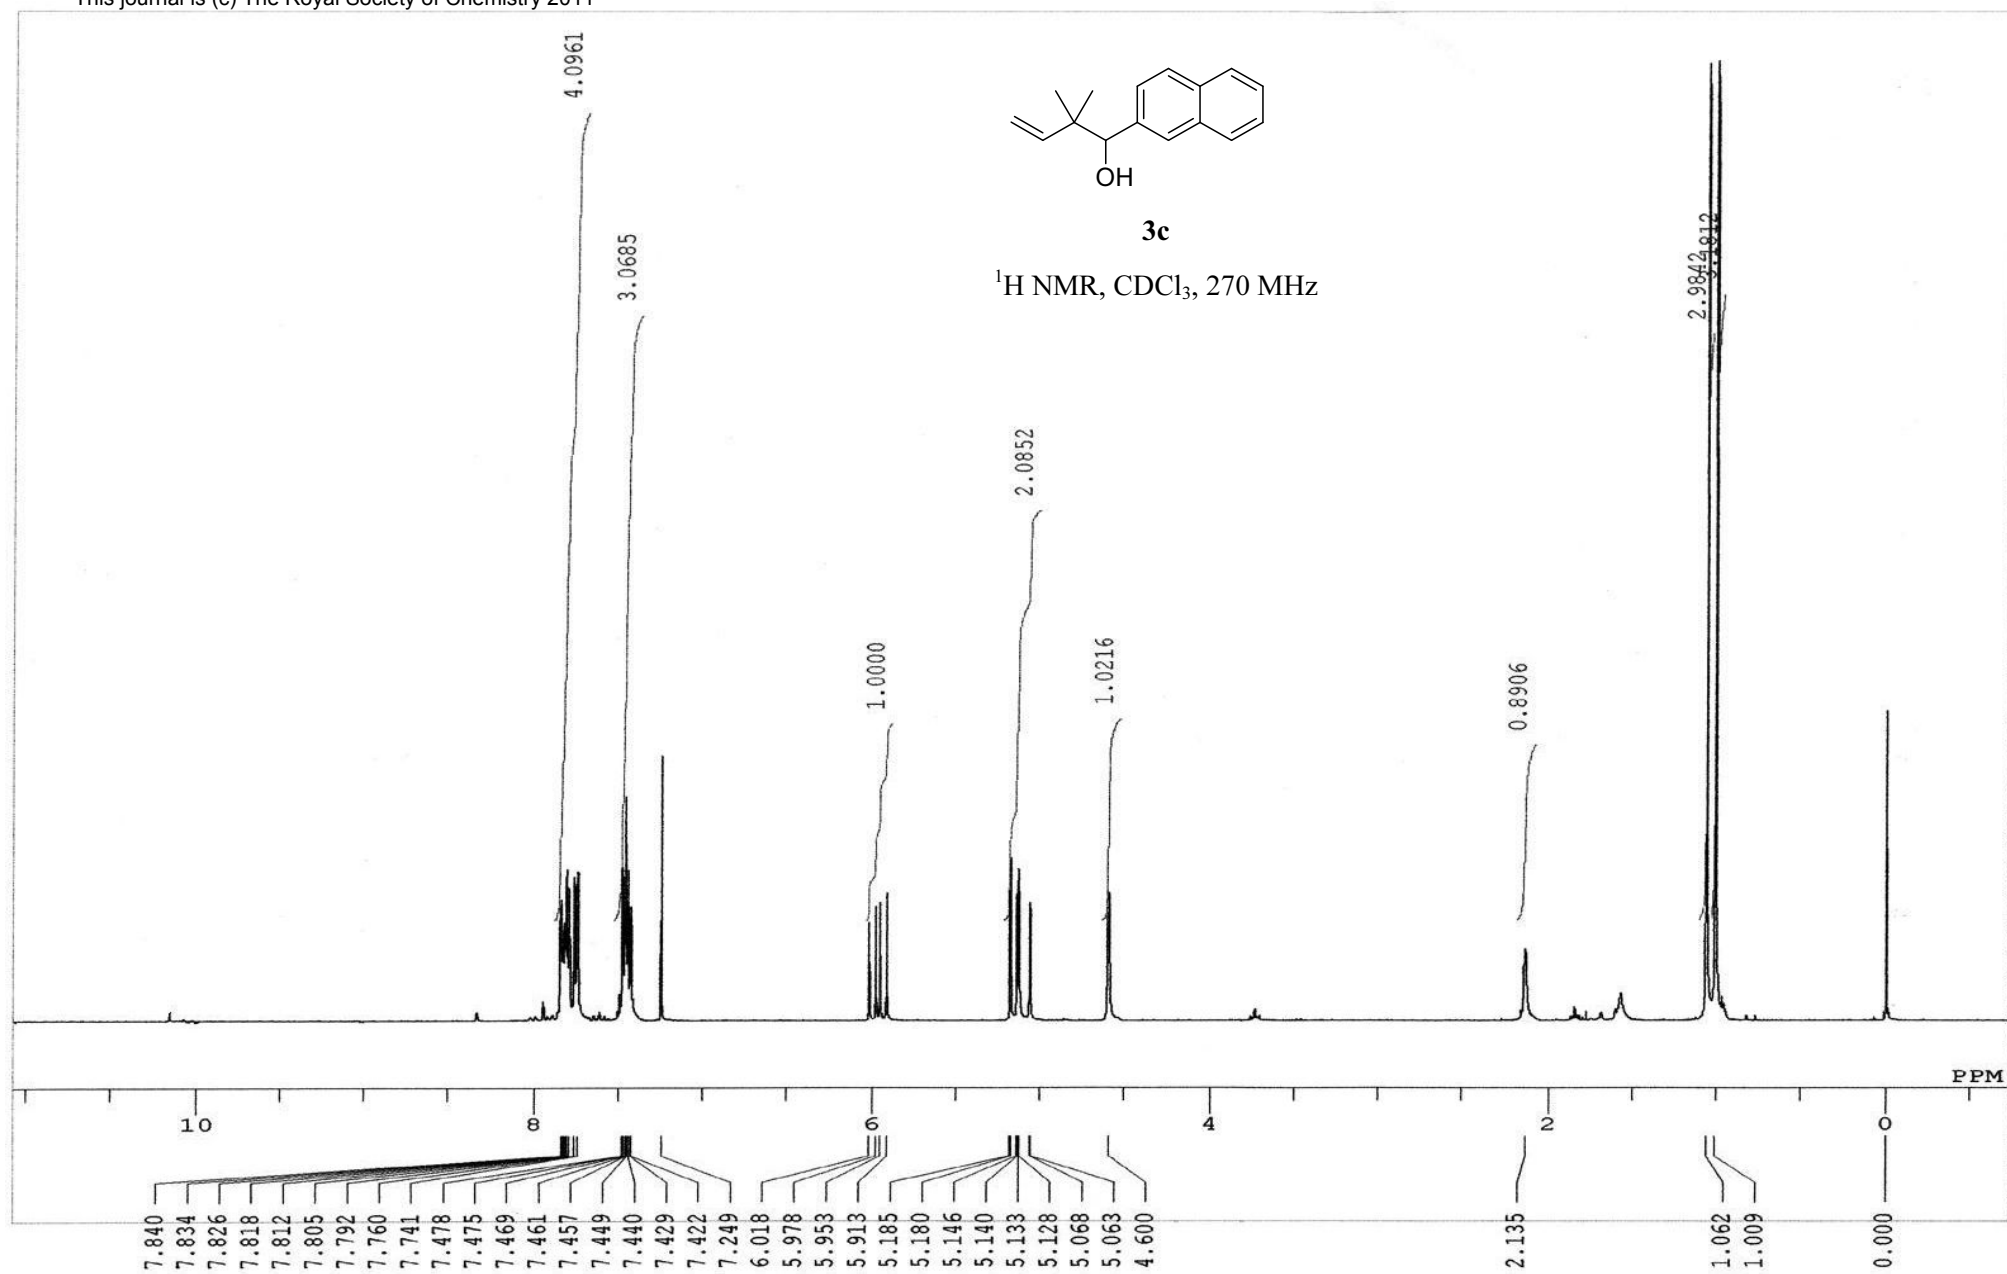

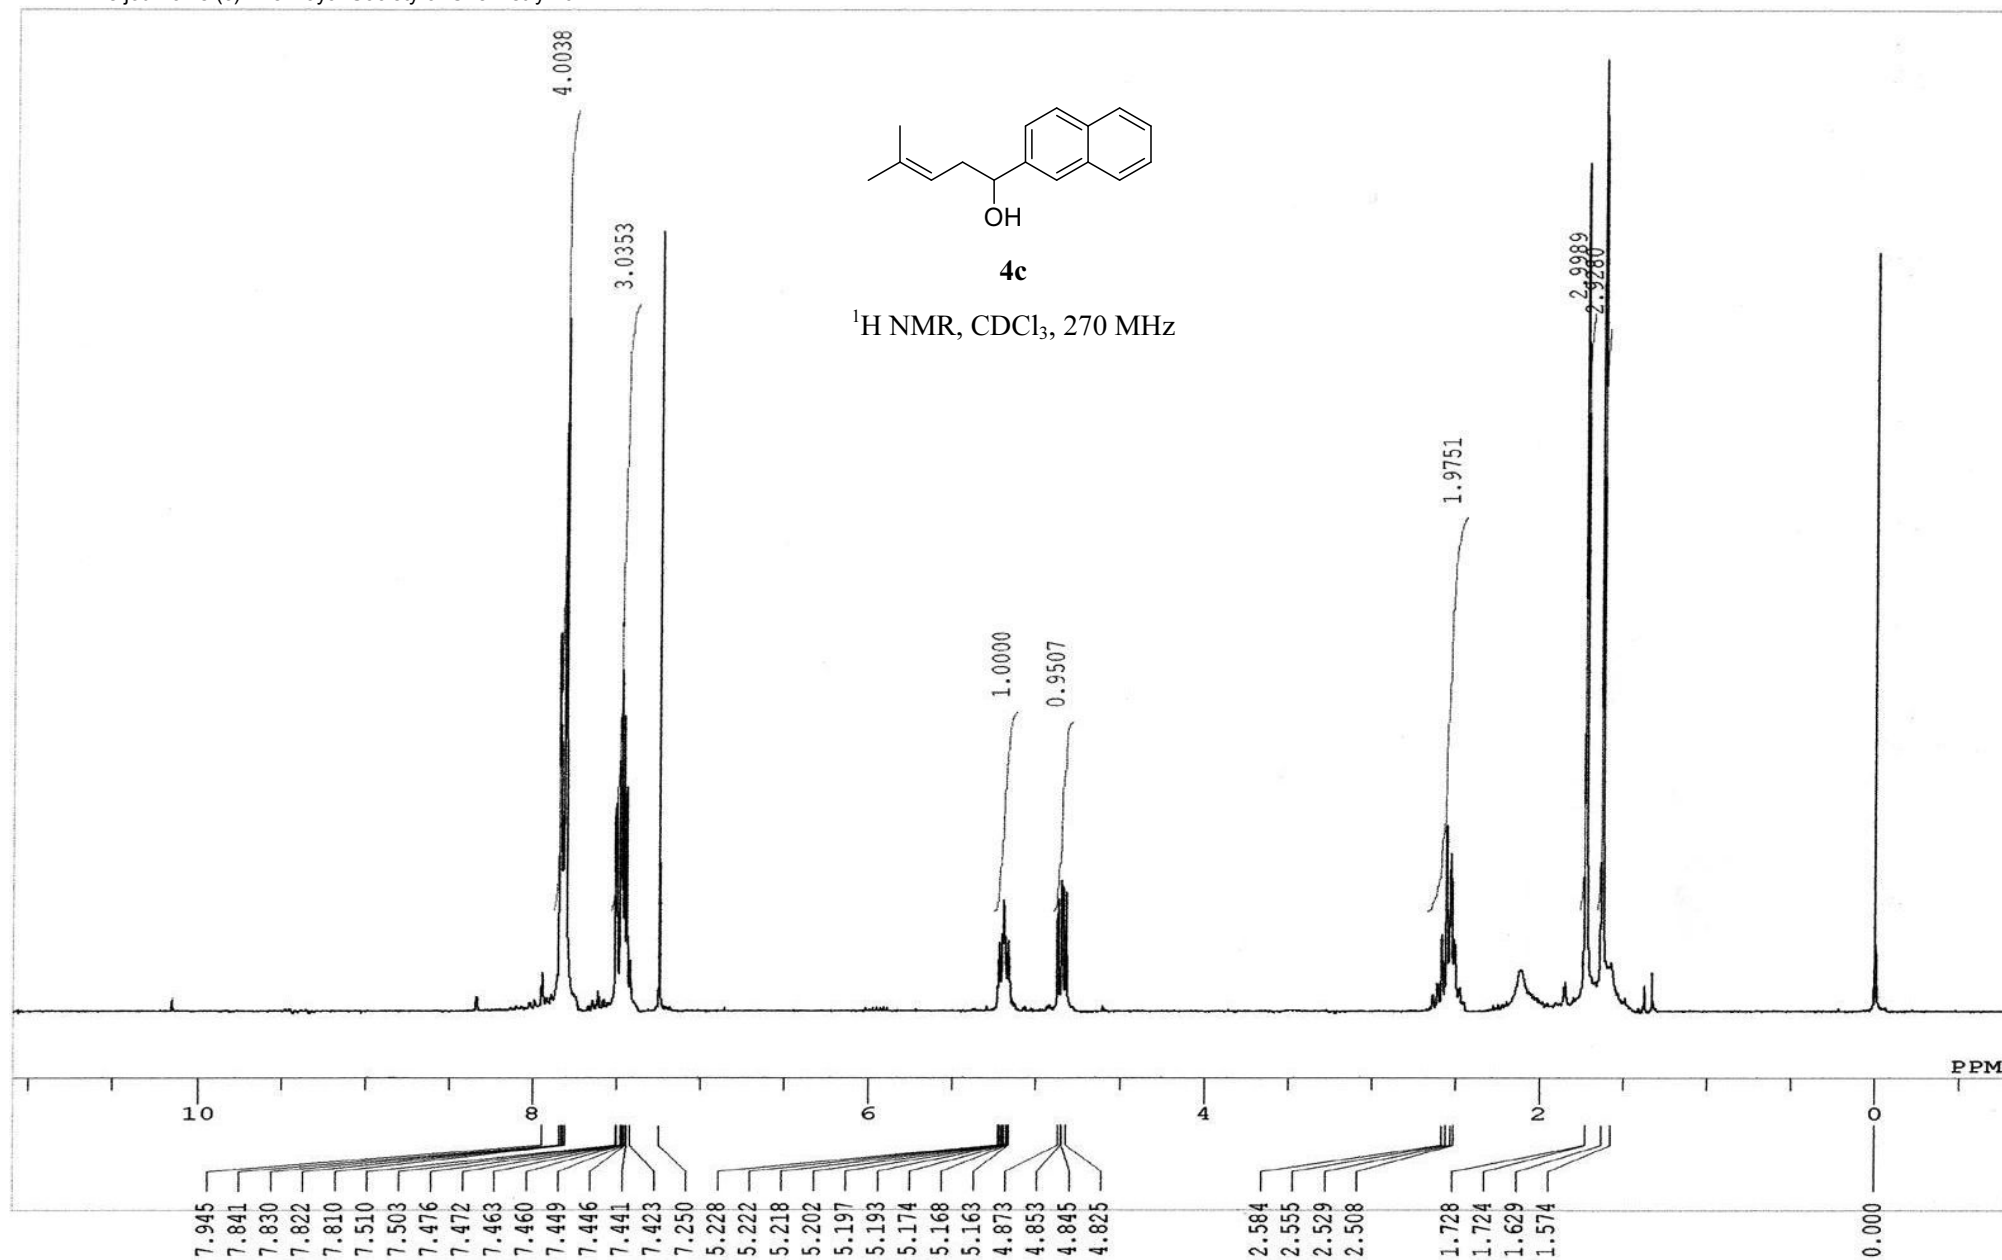

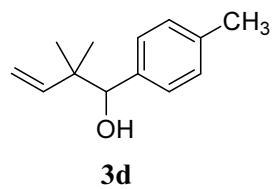

$^1\text{H}$  NMR,  $\text{CDCl}_3$ , 270 MHz

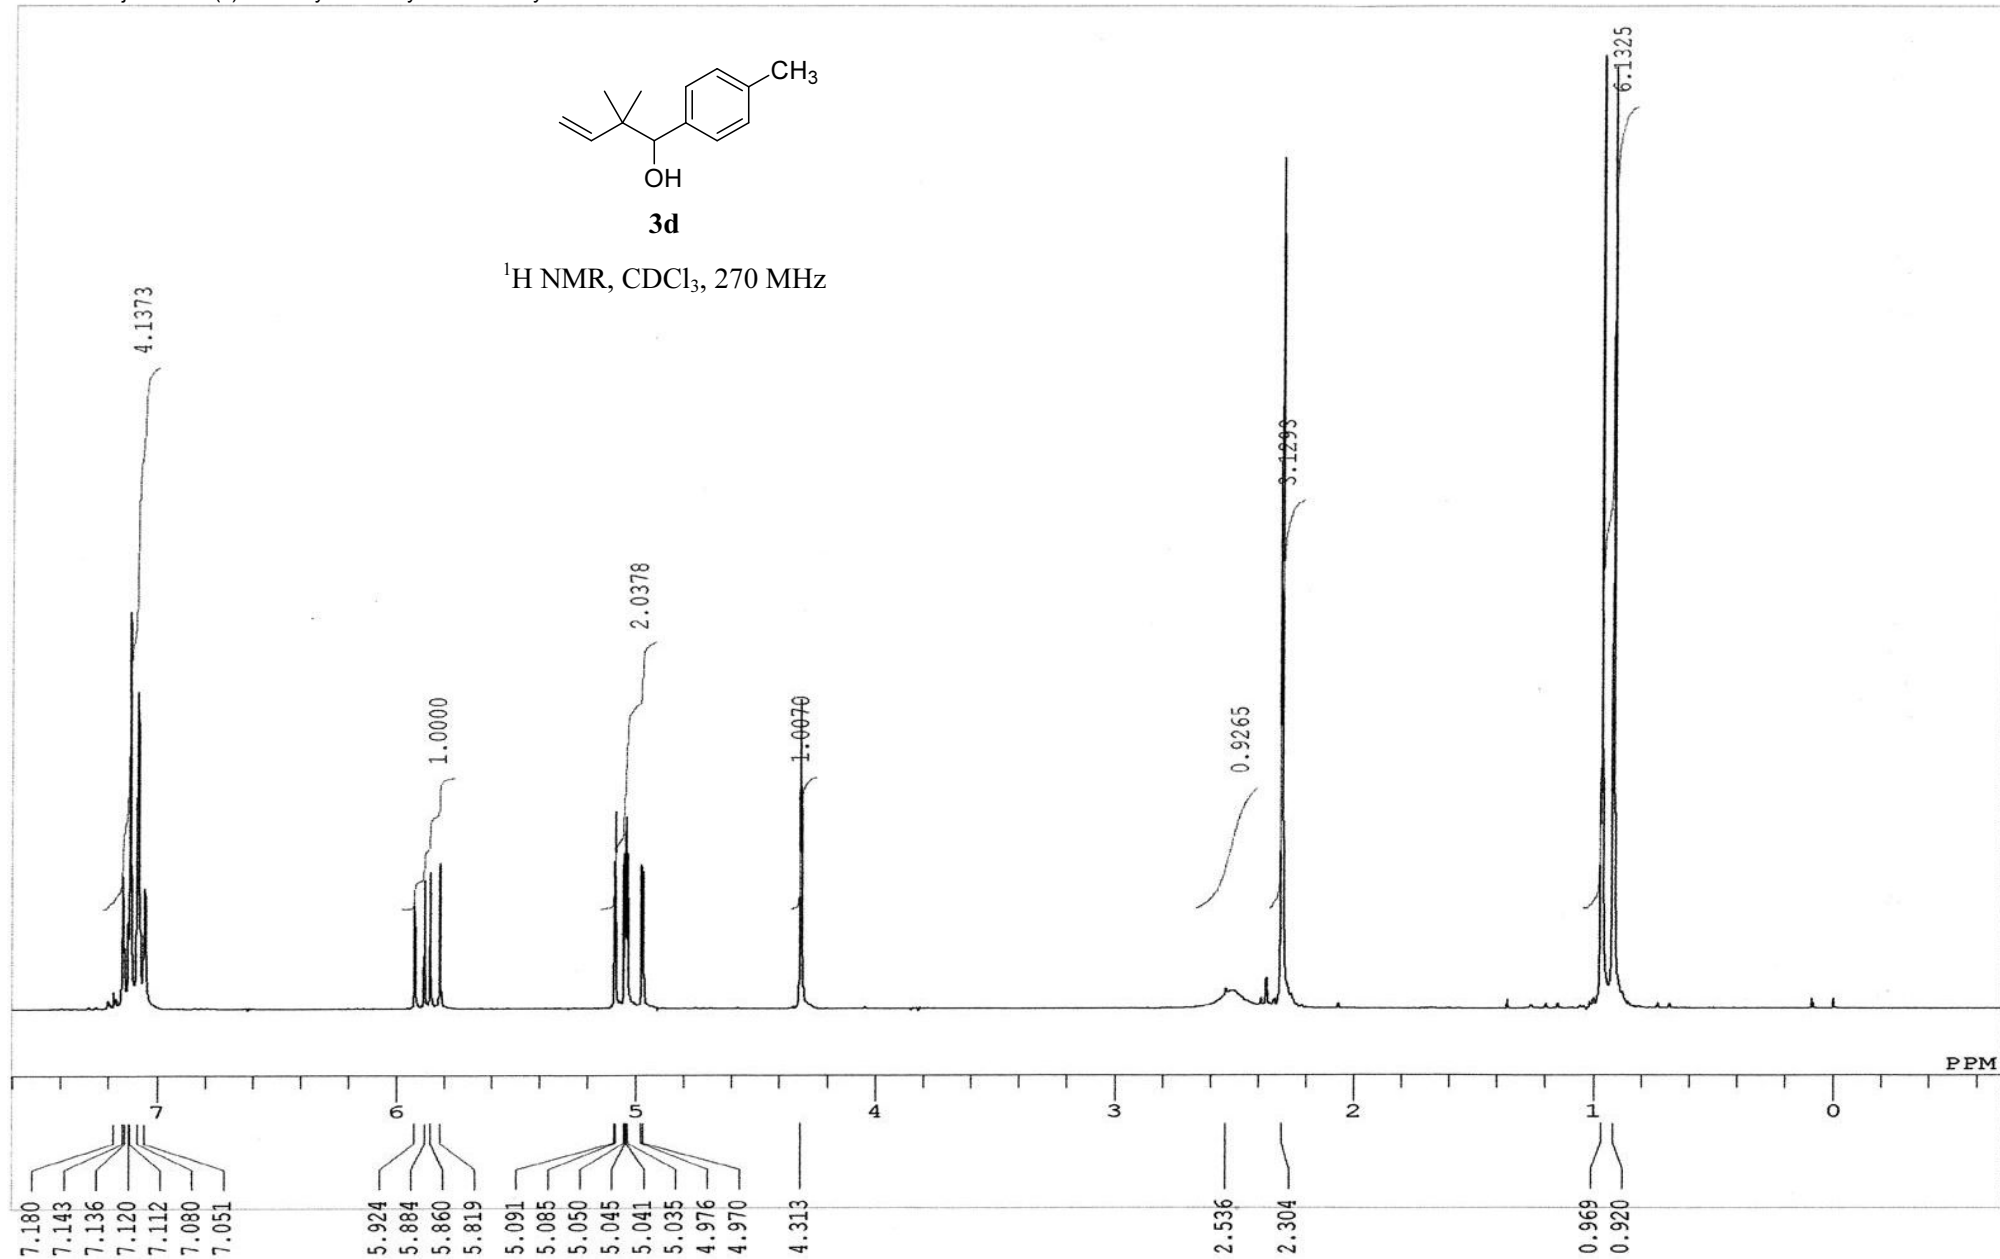



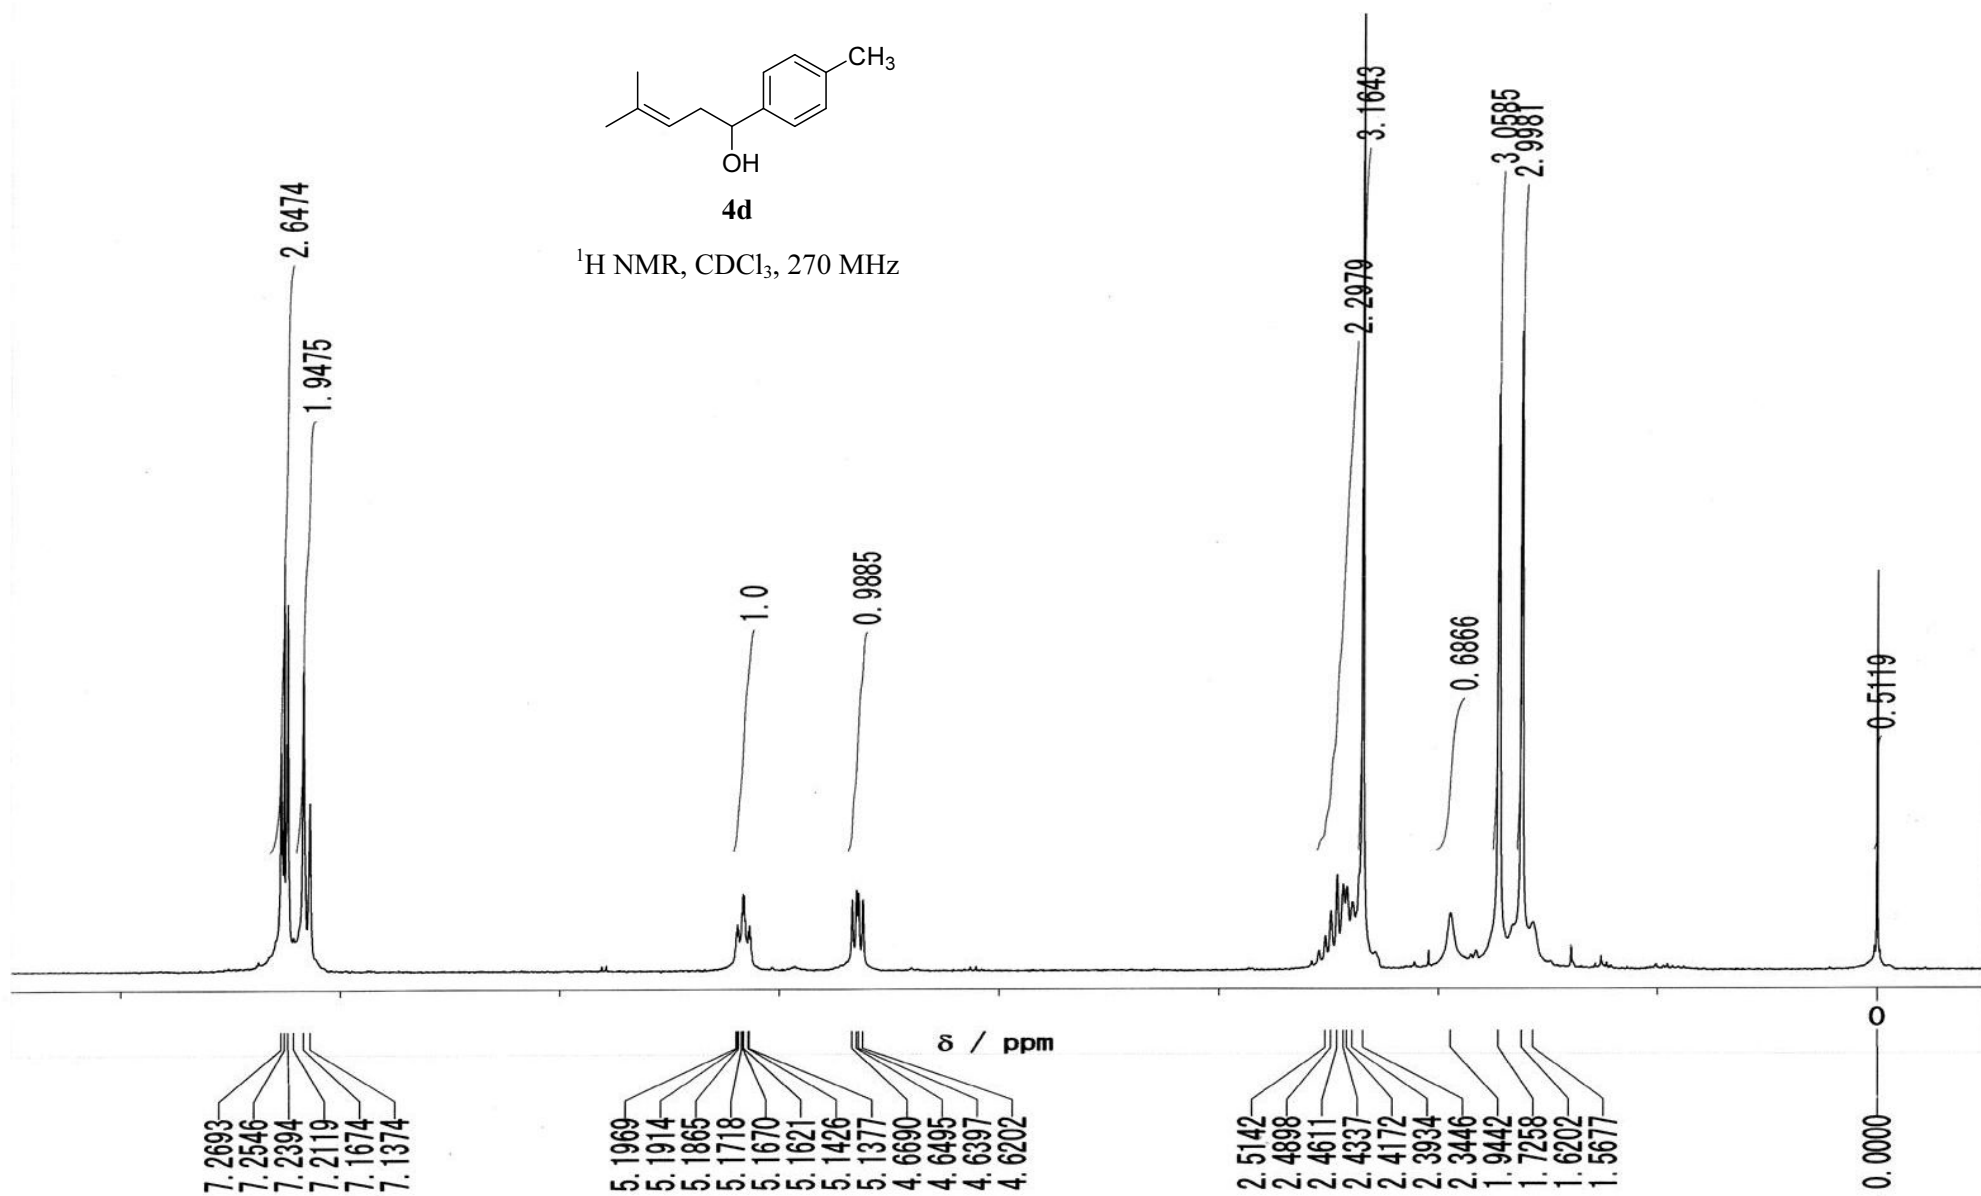

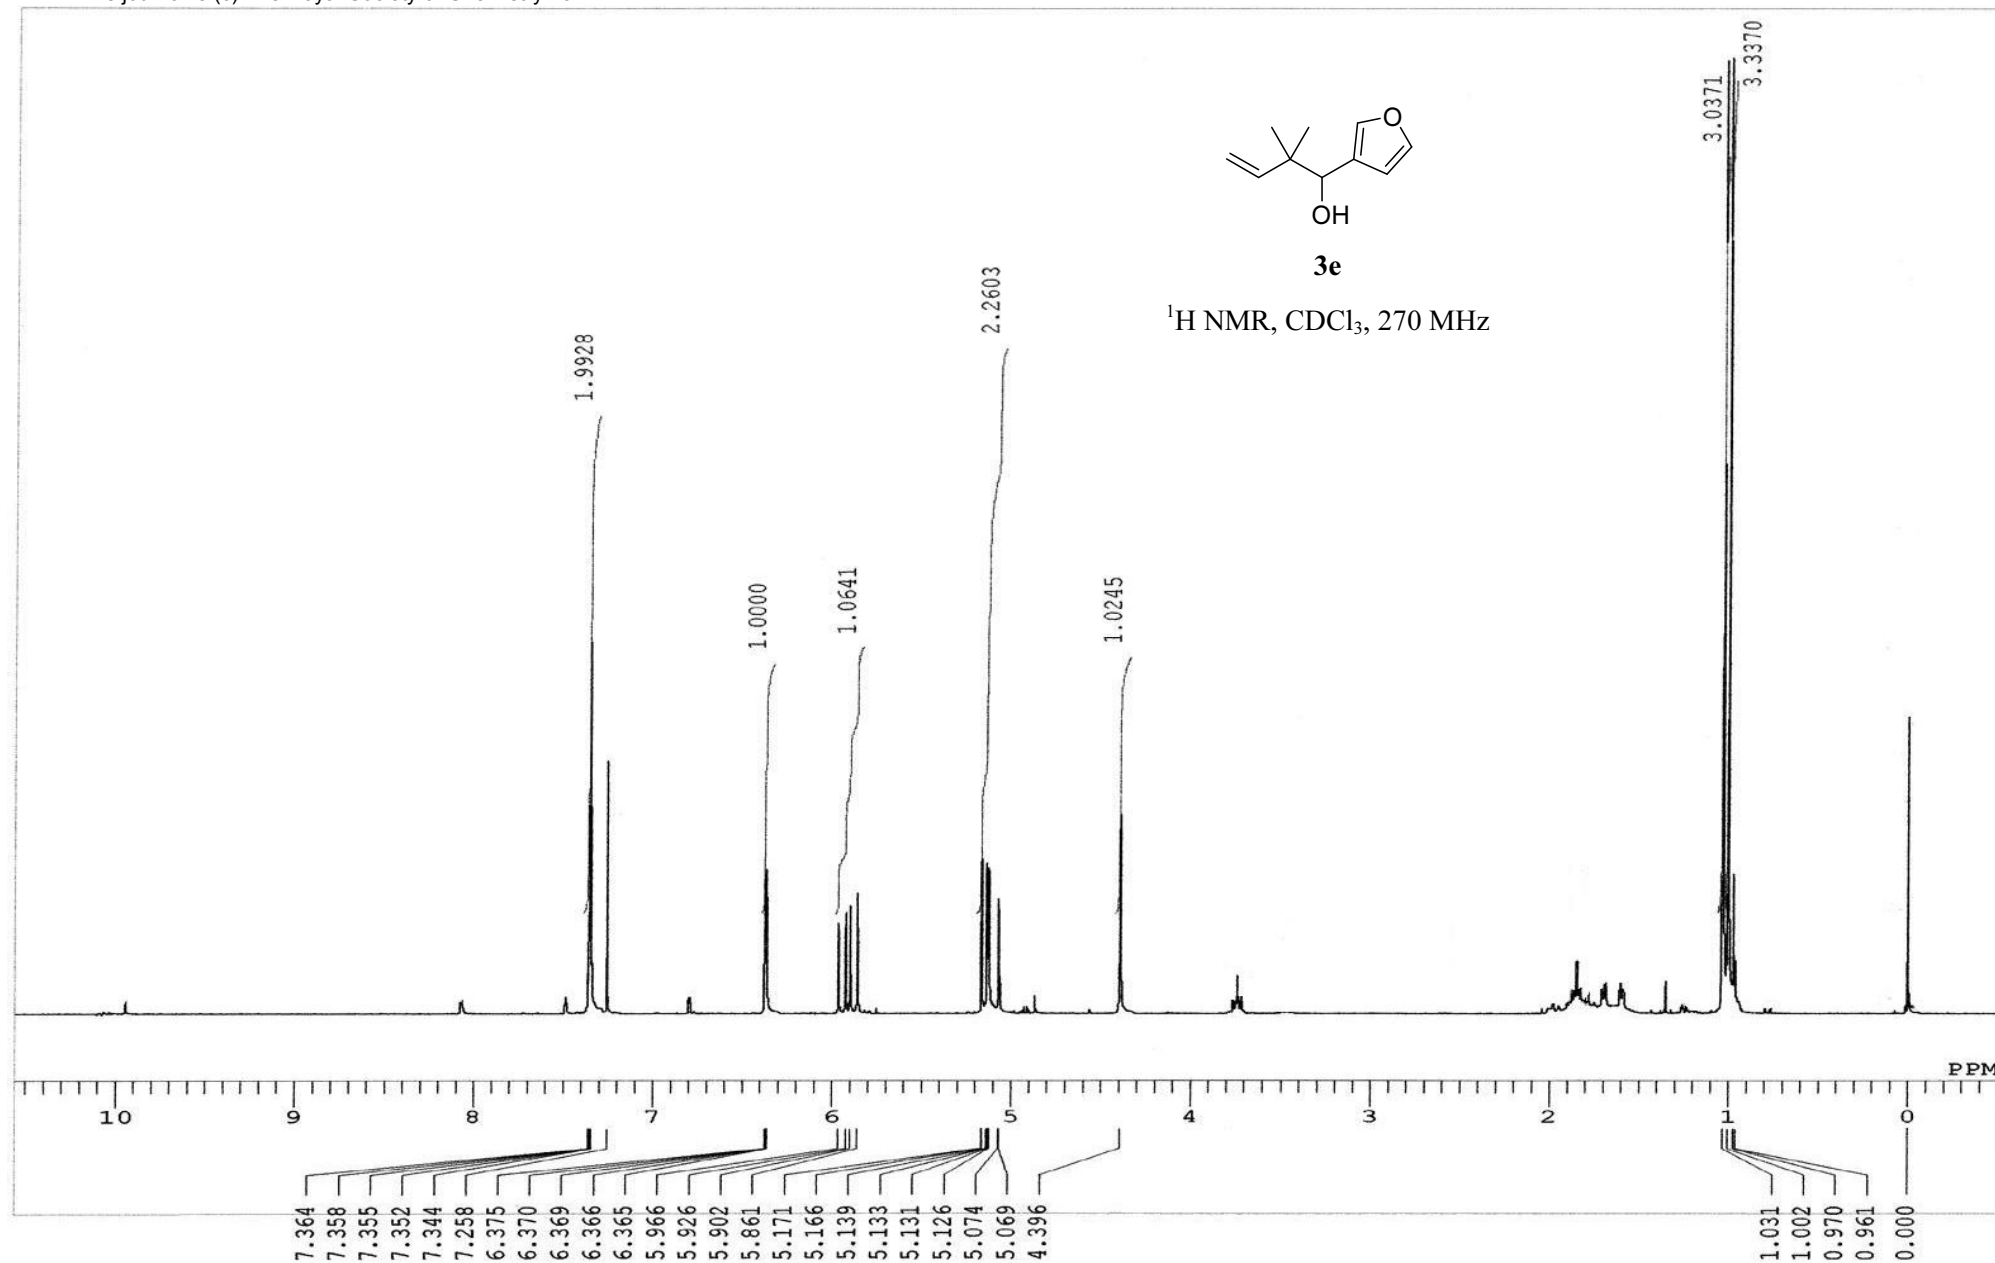

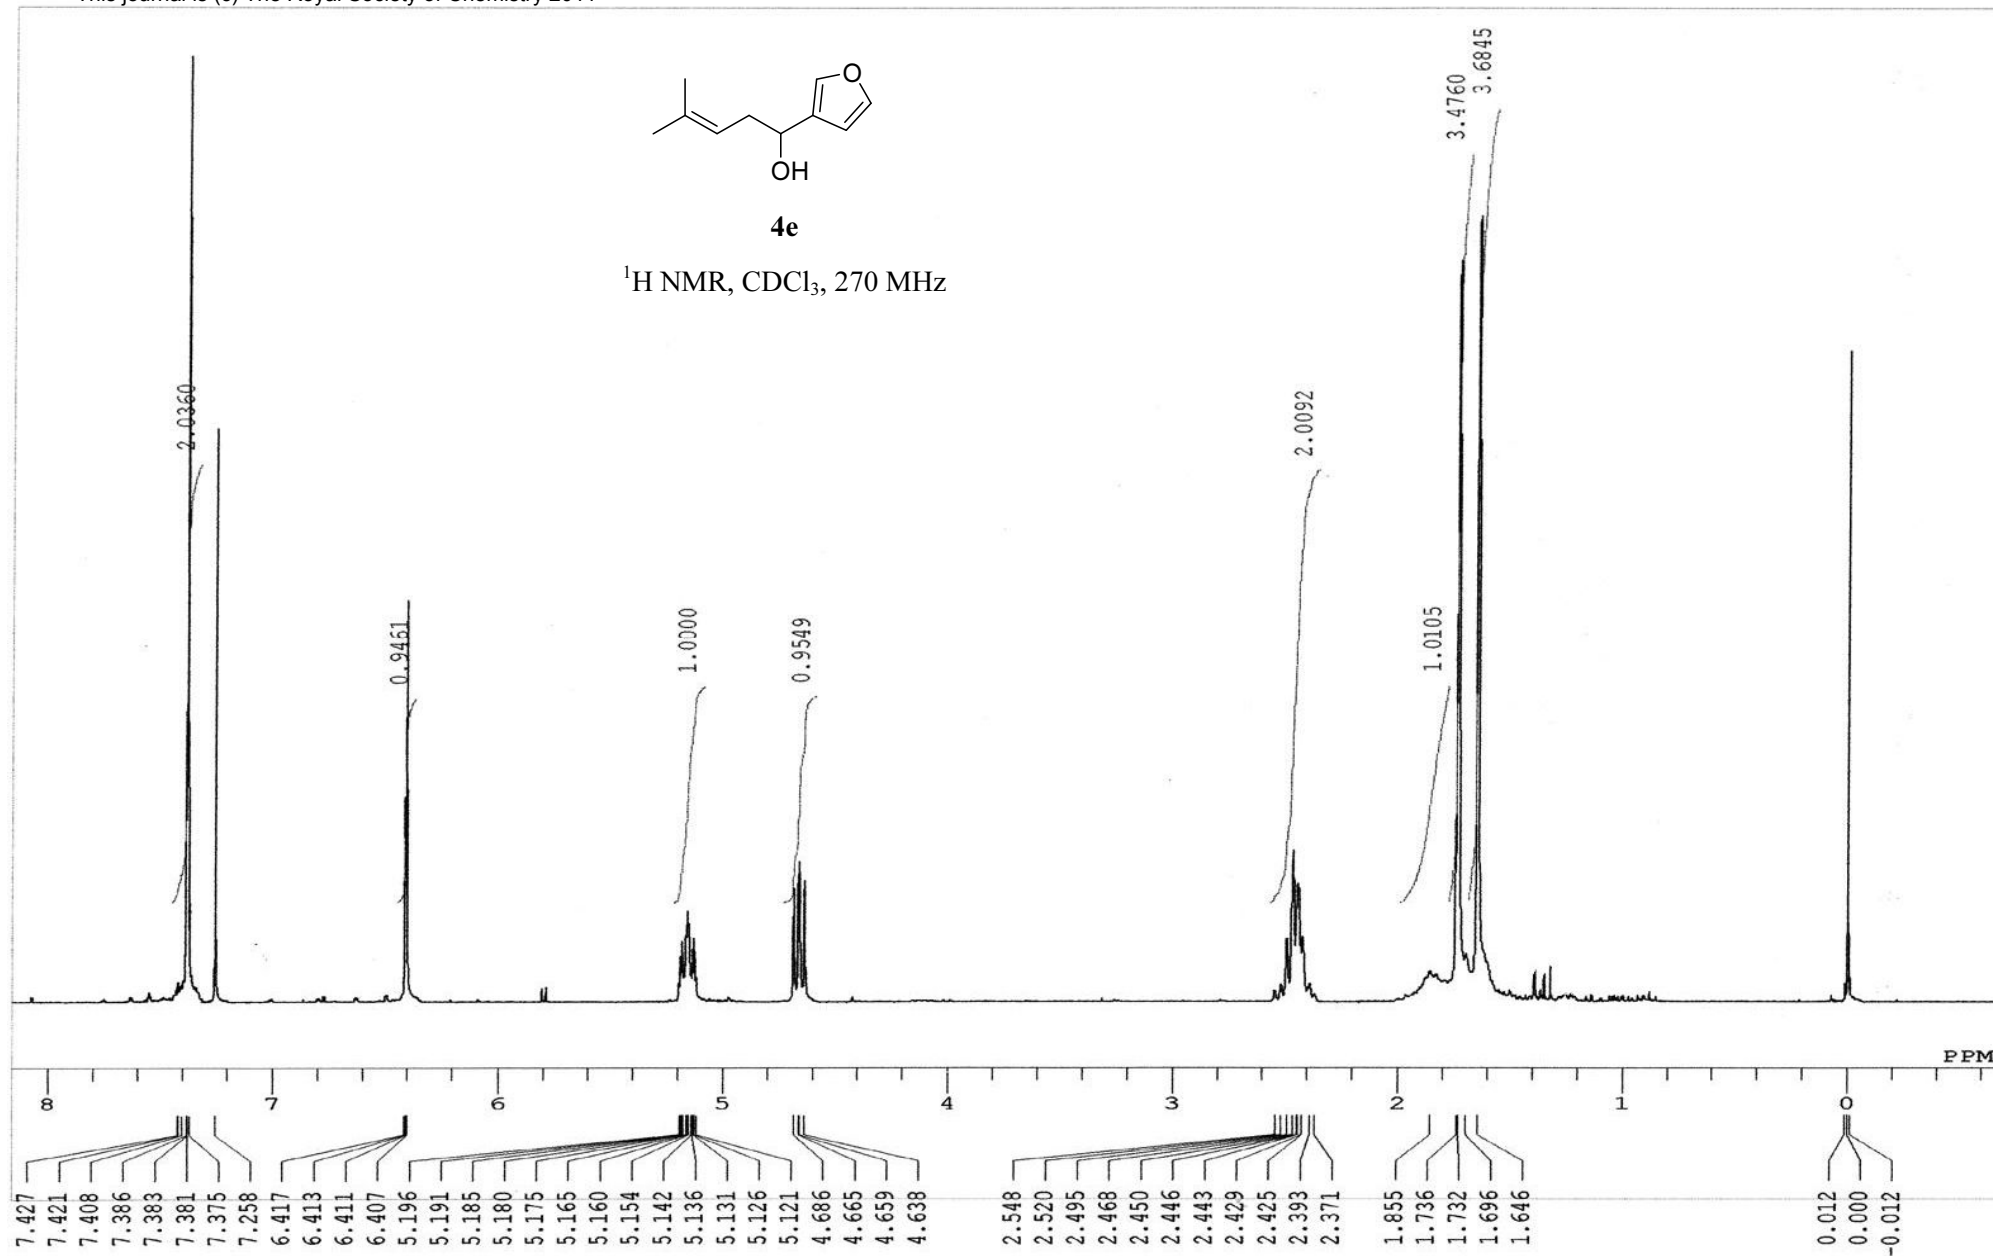

Supplement: c1ob05174a.pdf [file c1ob05174a.pdf]
